# Supplementary material for: Pandemic lockdown restrictions and COVID-19 hospitalization and deaths in patients with rheumatic and musculoskeletal diseases
Source: Research Square preprint supplement (doi:10.21203/rs.3.rs-1584534/v1), 2022-08-12

**Figure A1.** Effects of strict lockdown on daily rates (per million persons) of COVID-19 hospitalization/death and all-cause mortality among people with and without rheumatic and musculoskeletal diseases (RMD) aged  $\geq 65$  years in Norway compared with Skåne: estimates from event study.

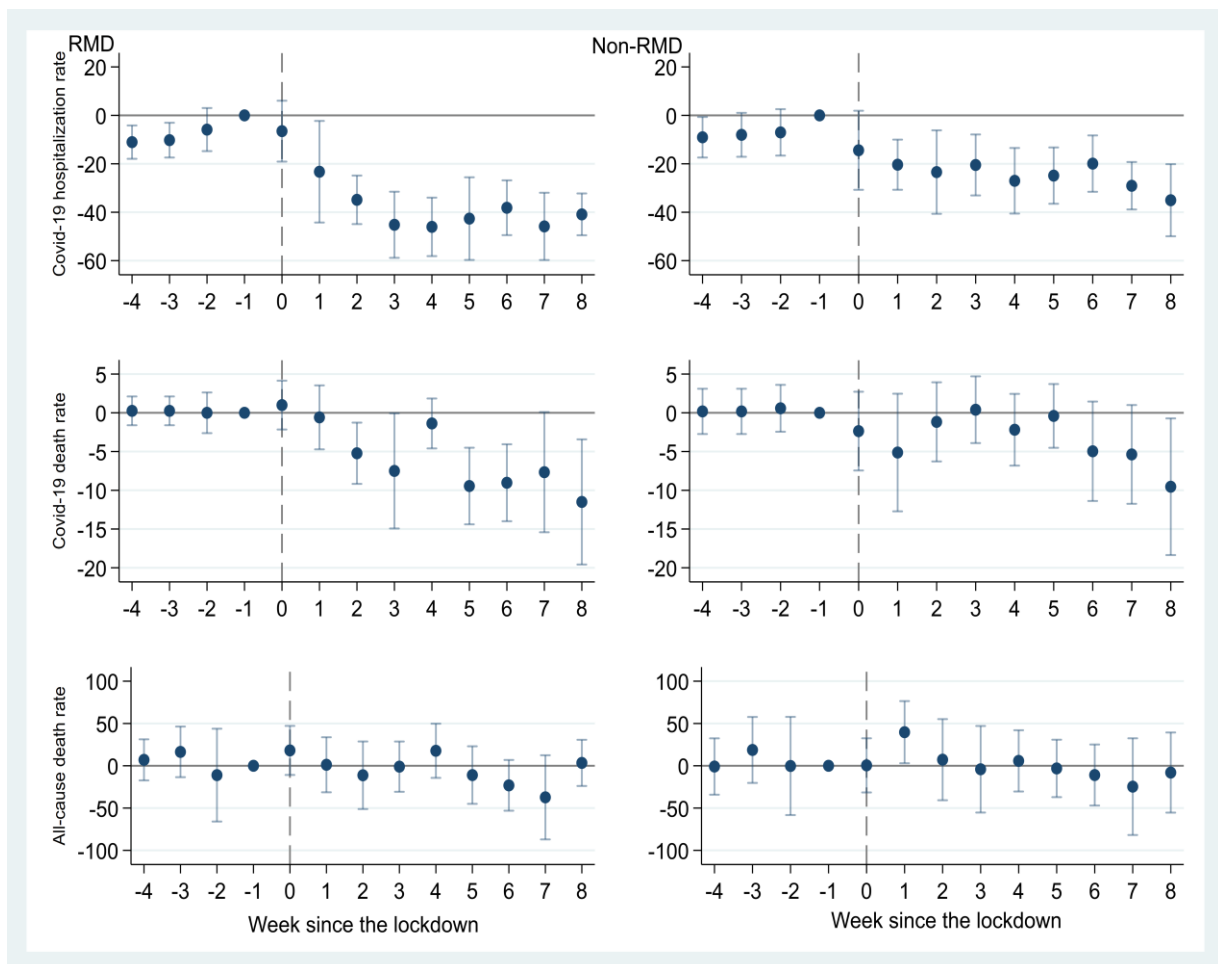

**Figure A2.** Effects of strict lockdown on daily rates (per million persons) of COVID-19 hospitalization/death and all-cause mortality among people with and without rheumatic and musculoskeletal diseases (RMD) aged  $\geq 80$  years in Norway compared with Skåne: estimates from event study.

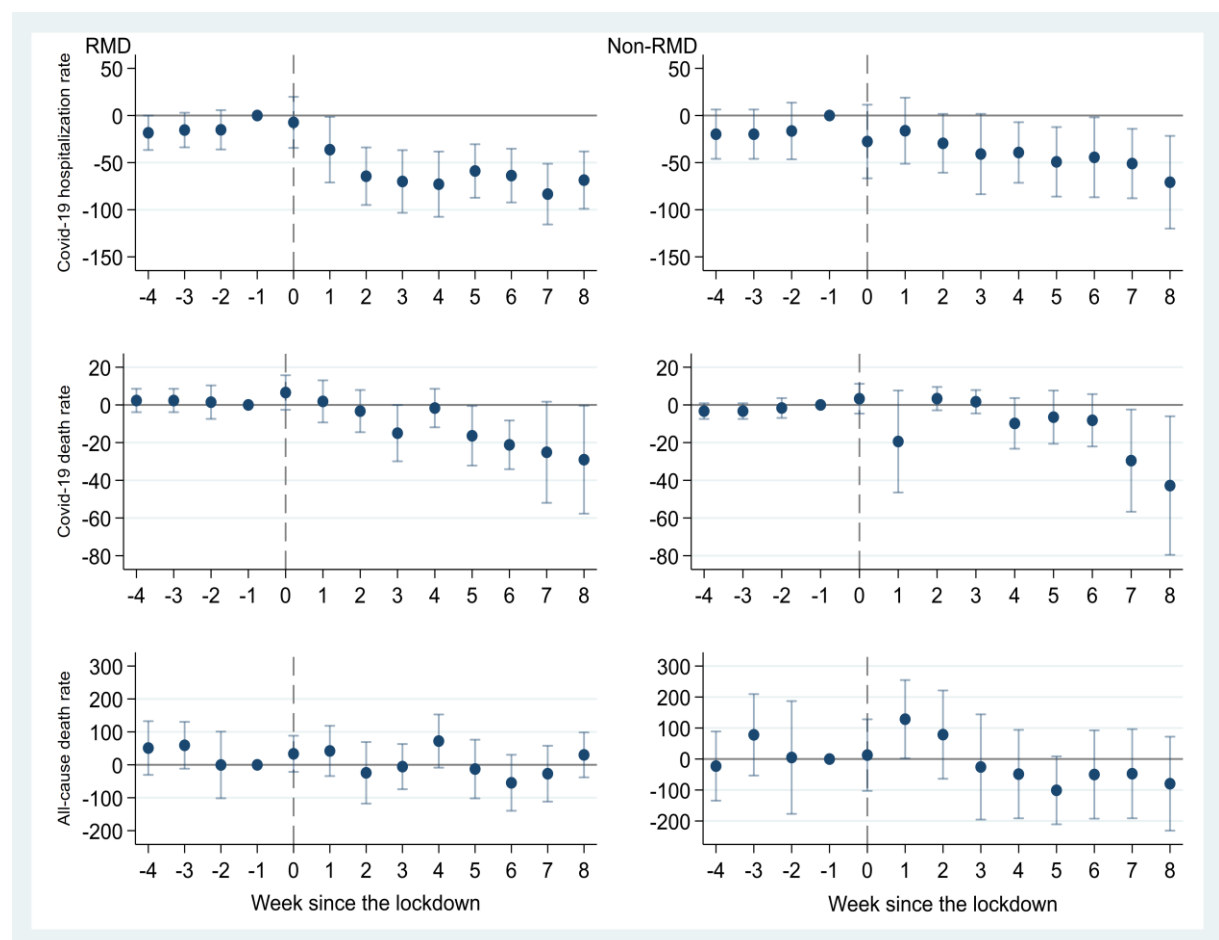

Supplement: Supplementary file 1 [file 5f6f5b2fe9a9c474138919a8.pdf]
